# Supplementary material for: Composition and Antioxidant, Antienzymatic and Antimicrobial Activities of Volatile Molecules from Spanish Salvia lavandulifolia (Vahl) Essential Oils
Source: PubMed Central journal article supplement (PMC6152226; doi:10.3390/molecules22081382), 2017-08-21
Supplement: molecules-22-01382-s001.pdf [file molecules-22-01382-s001.pdf]

# Composition and Antioxidant, Antienzymatic and Antimicrobial Activities of Volatile Molecules from Spanish *Salvia lavandulifolia* (Vahl) Essential Oils

## Supplementary Materials

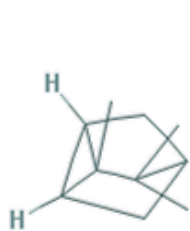

Tricyclene (1)

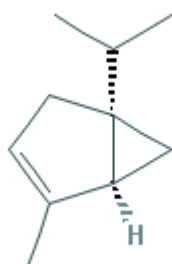

$\alpha$ -Thujene (2)

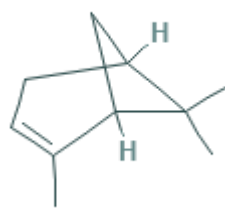

$\alpha$ -Pinene (3)

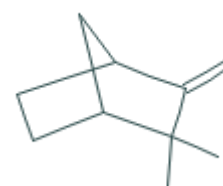

Camphene (4)

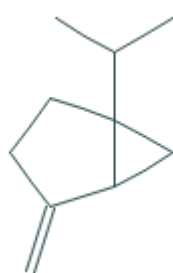

Sabinene (5)

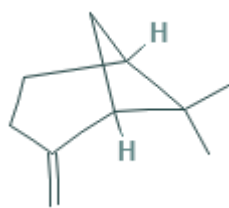

$\beta$ -Pinene (6)

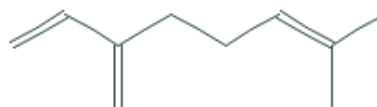

Myrcene (7)

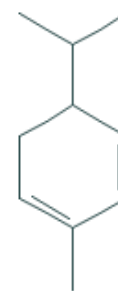

$\alpha$ -Pellandrene (8)

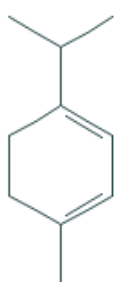

$\alpha$ -Terpinene (9)

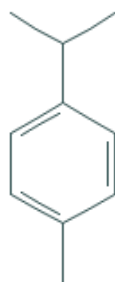

*p*-Cymene (10)

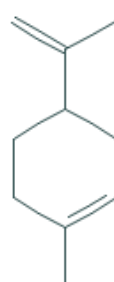

Limonene (11)

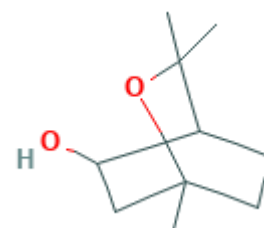

1,8-Cineole  
(12)

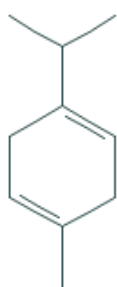

$\gamma$ -Terpinene (13)

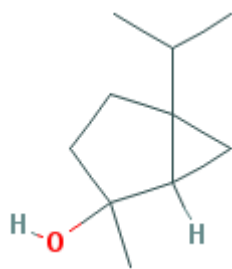

Sabinene hydrate (14)

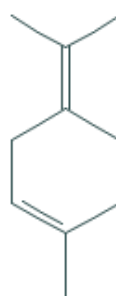

Terpinolene (15)

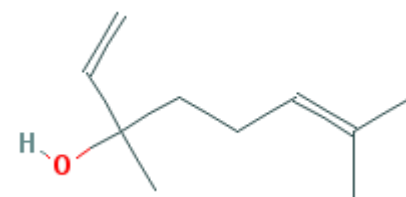

Linalool (16)

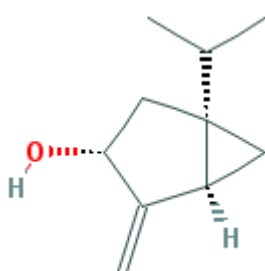

(-)-cis-Sabinol (17)

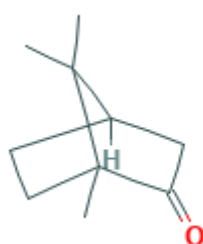

Camphor (18)

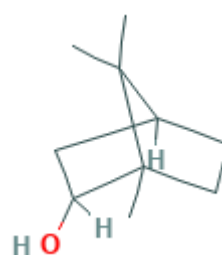

Borneol (19)

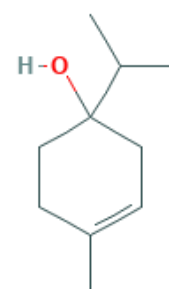

Terpinen-4-ol (20)

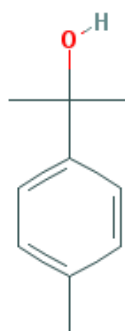

*p*-cymen-8-ol (21)

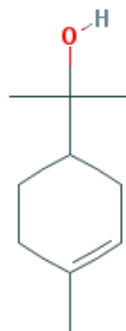

$\alpha$ -Terpineol (22)

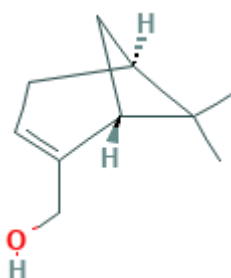

(-)-Myrtenol (23)

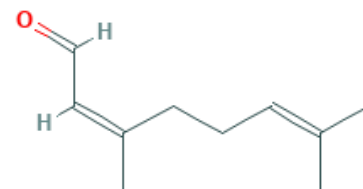

(*Z*)-Citral (24)

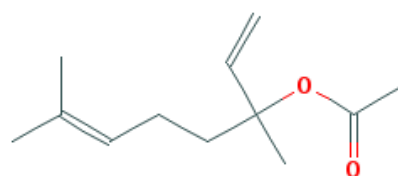

Linalyl acetate (25)

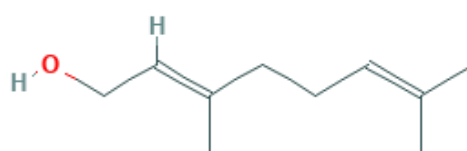

Geraniol (26)

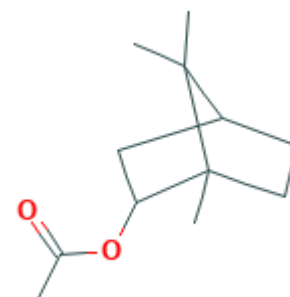

Bornyl acetate (27)

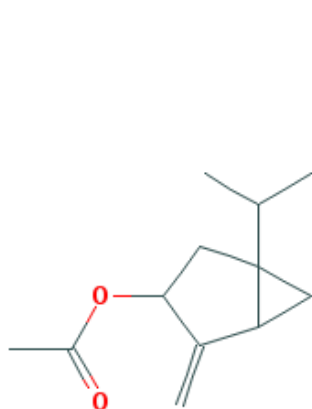

Sabinyl acetate (28)

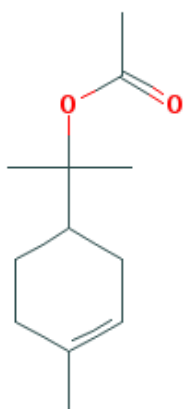

$\alpha$ -Terpinyl acetate (29)

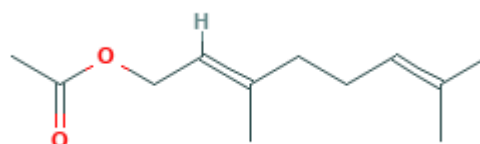

Geranyl acetate (30)

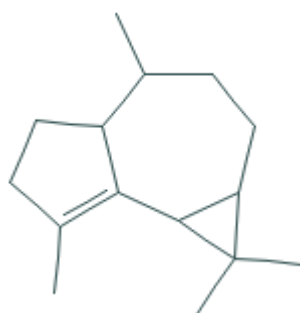

$\alpha$ -Gurjunene (31)

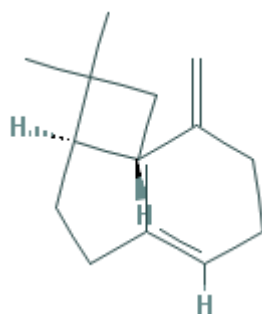

(*E*)- $\beta$ -Caryophyllene (32)

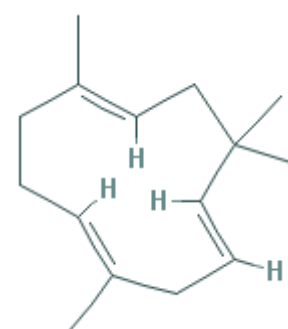

$\alpha$ -Humulene (33)

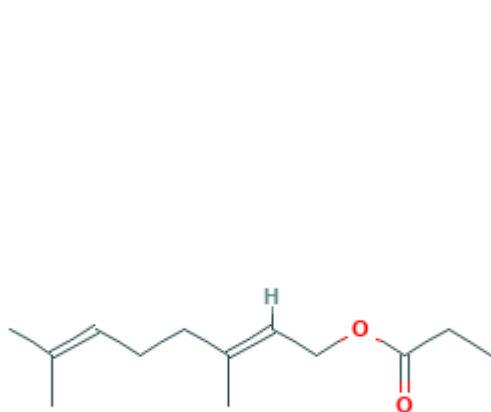

Geranyl propionate (34)

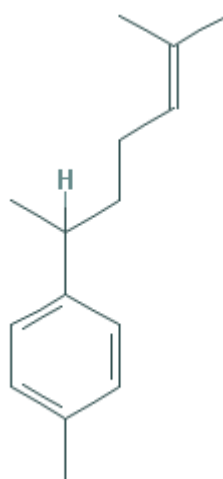

$\alpha$ -Curcurnene (35)

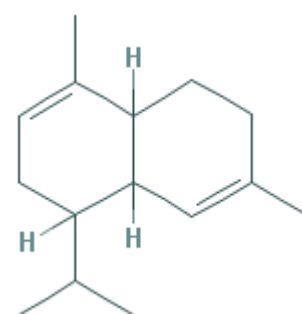

$\alpha$ -Muurolene (36)

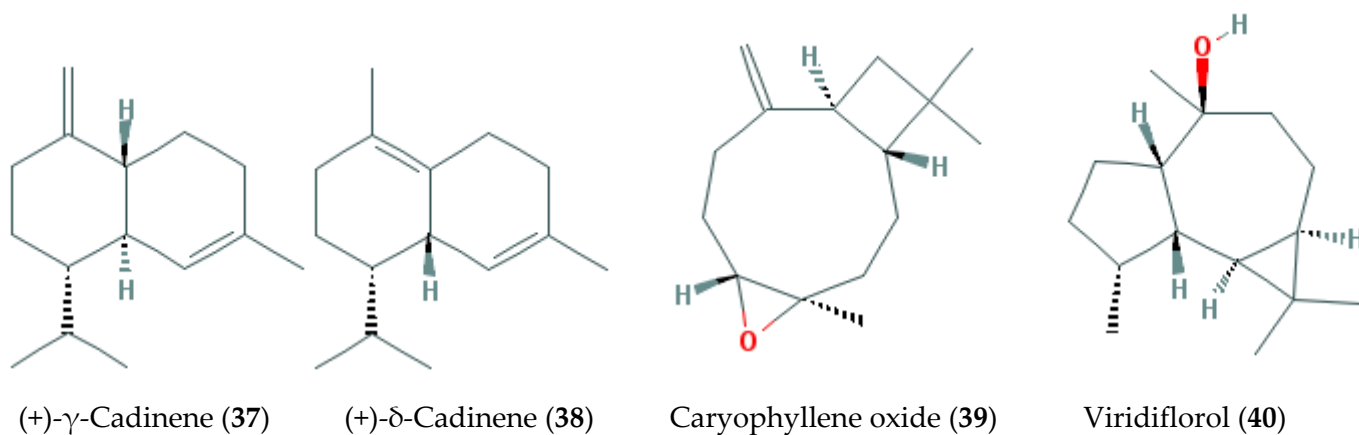

Figure S1: Structures of compounds in the EOs.

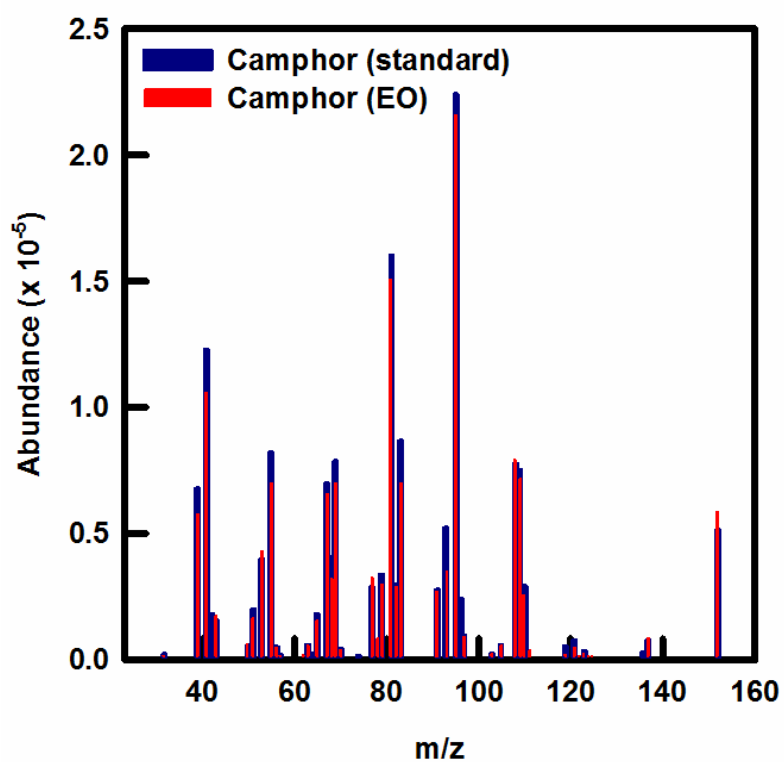

Figure S2: Mass spectra of camphor. Comparison between mass spectra of commercial and natural EO compound.

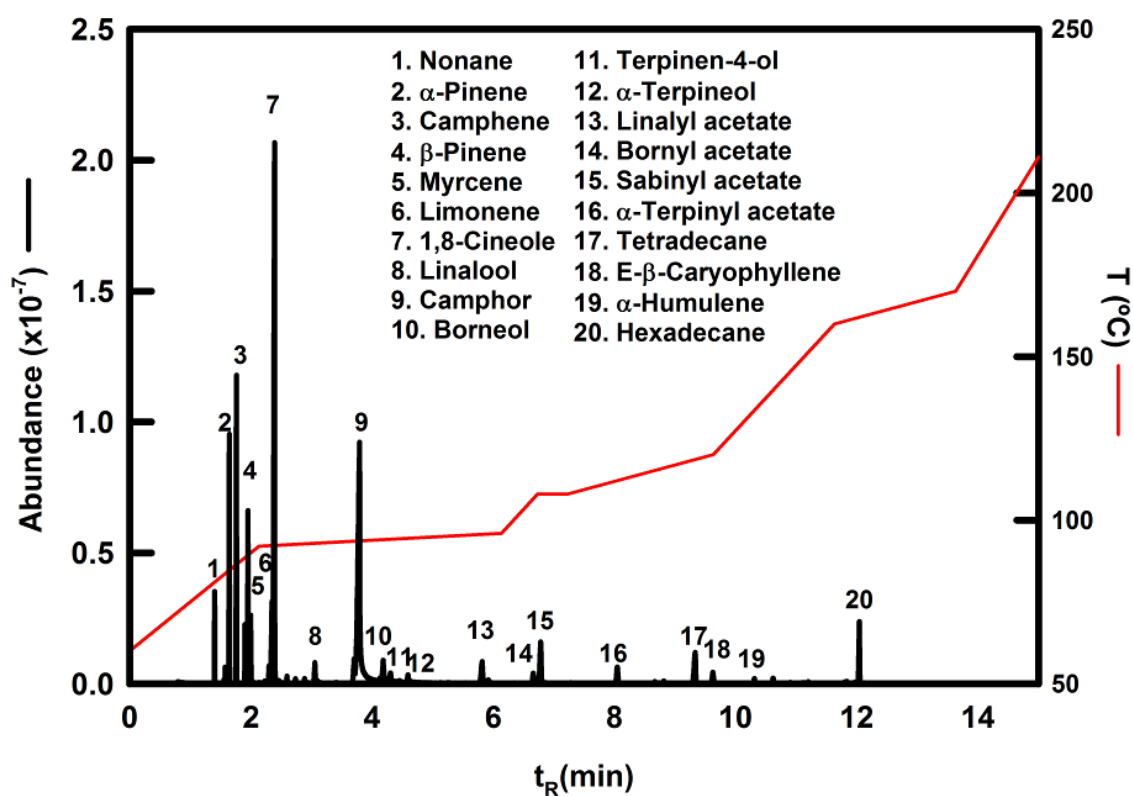

Figure S3: FGC-MS chromatogram of SIEO-1. Main compounds are identified with different numbers.

**Table S1:** Calibration curve parameters to determine the absolute volatile concentration of SIEOs.

| Compound                              | Calibration Curve <sup>a</sup>                      | R <sup>2</sup> | Calibration Range (mmol/L) | RSD (%) | LOD (mmol/L) | LOQ (mmol/L) | Standard source | Product Reference |
|---------------------------------------|-----------------------------------------------------|----------------|----------------------------|---------|--------------|--------------|-----------------|-------------------|
| Nonane                                | Internal standard (MS 43 <sup>b</sup> , 57, 71, 85) |                |                            |         |              |              | SAFC            | 442694            |
| (-) $\alpha$ -Pinene                  | $y = 1.272x - 0.008$                                | 0.999          | 10.06-0.25                 | 0.97    | 0.025        | 0.076        | Fluka           | 80599             |
| (+) <i>Camphene</i>                   | $y = 0.728x + 0.001$                                | 0.999          | 11.09-0.28                 | 0.56    | 0.054        | 0.165        | SAFC            | w222909           |
| Sabinene                              | $y = -0.796x + 0.022$                               | 0.999          | 9.78-0.61                  | 1.08    | 0.091        | 0.277        | Extrasynthese   | 5062 S            |
| (-) $\beta$ -Pinene                   | $y = 1.053x - 0.010$                                | 1.000          | 10.29-0.26                 | 1.26    | 0.026        | 0.078        | Fluka           | 80609             |
| Myrcene                               | $y = 0.675x - 0.011$                                | 0.999          | 8.97-0.22                  | 1.41    | 0.018        | 0.056        | Fluka           | 64643             |
| (-) <i>Phellandrene</i>               | $y = 0.528x - 0.008$                                | 0.999          | 9.52-0.60                  | 1.60    | 0.106        | 0.322        | Aldrich         | bcb8659           |
| $\alpha$ -Terpinene                   | $y = 0.591x - 0.024$                                | 0.999          | 15.75-0.59                 | 1.27    | 0.149        | 0.453        | Aldrich         | 86473             |
| <i>p</i> -Cymene                      | $y = 2.709x - 0.003$                                | 0.999          | 9.95-0.25                  | 1.08    | 0.010        | 0.030        | Aldrich         | c121452           |
| (+) <i>Limonene</i>                   | $y = 1.308x - 0.026$                                | 0.999          | 9.55-0.24                  | 0.98    | 0.039        | 0.120        | Fluka           | 62118             |
| 1,8-Cineole                           | $y = 0.523x - 0.008$                                | 1.000          | 9.55-0.60                  | 1.55    | 0.164        | 0.497        | SAFC            | w246506           |
| $\gamma$ -Terpinene                   | $y = 0.906x - 0.018$                                | 0.999          | 9.87-0.25                  | 1.04    | 0.020        | 0.062        | Aldrich         | 223190            |
| Sabinene hydrate                      | $y = 0.562x - 0.013$                                | 0.999          | 9.66-0.60                  | 3.17    | 0.102        | 0.309        | FLUKA           | 96573             |
| Terpinolene                           | $y = 0.618x - 0.021$                                | 0.999          | 15.34-0.92                 | 0.69    | 0.230        | 0.699        | SAFC            | W304603           |
| (-) <i>Linalool</i>                   | $y = 0.471x - 0.009$                                | 0.999          | 8.80-0.55                  | 3.13    | 0.102        | 0.309        | Fluka           | 74856             |
| Tetradecane                           | Internal standard (MS 43, 57 <sup>b</sup> , 71, 85) |                |                            |         |              |              | SAFC            | 442708            |
| (+) <i>Camphor</i>                    | $y = 0.090x - 0.007$                                | 0.999          | 9.64-0.96                  | 0.86    | 0.241        | 0.733        | Alfa Aesar      | A10708            |
| (-) <i>Borneol</i>                    | $y = 0.154x - 0.002$                                | 0.999          | 8.99-0.90                  | 1.93    | 0.196        | 0.595        | Alfa Aesar      | A12684            |
| (-) <i>Terpinen-4-ol</i>              | $y = 0.285x - 0.009$                                | 0.999          | 9.57-0.96                  | 3.59    | 0.239        | 0.727        | Aldrich         | 11584             |
| (+) $\alpha$ -Terpineol               | $y = 0.169x$                                        | 0.998          | 9.87-0.99                  | 1.97    | 0.247        | 0.750        | Fluka           | 83073             |
| R(-)- <i>Myrtenol</i>                 | $y = 0.183x + 0.002$                                | 0.999          | 16.87-2.53                 | 2.62    | 0.440        | 1.337        | SAFC            | S37589-149        |
| Linalyl acetate                       | $y = 0.179x + 0.005$                                | 0.993          | 11.97-1.80                 | 1.93    | 0.449        | 1.365        | SAFC            | w263605           |
| Geraniol                              | $y = 0.221x - 0.006$                                | 1.000          | 15.04-0.90                 | 0.61    | 0.295        | 0.896        | SAFC            | w250716           |
| (-) <i>Bornyl acetate</i>             | $y = 0.355x - 0.001$                                | 0.999          | 13.59-0.82                 | 1.65    | 0.204        | 0.620        | FLUKA           | 45855             |
| (+) $\alpha$ -Terpinyl acetate        | $y = 0.296x$                                        | 1.000          | 11.95-1.79                 | 0.99    | 0.243        | 0.740        | Aldrich         | 1439212           |
| Geranyl acetate                       | $y = 0.391x - 0.006$                                | 0.999          | 12.37-0.46                 | 0.17    | 0.116        | 0.353        | Aldrich         | 173495            |
| (-) <i>E</i> - $\beta$ -Caryophyllene | $y = 0.094x + 0.003$                                | 0.999          | 6.35-1.09                  | 2.49    | 0.360        | 1.093        | Sigma           | 22075             |
| $\alpha$ -Humulene                    | $y = 0.416x - 0.011$                                | 0.999          | 6.35-0.63                  | 1.85    | 0.154        | 0.469        | Aldrich         | 53675             |
| Hexadecane                            | Internal standard (MS 41, 43, 57 <sup>b</sup> , 71) |                |                            |         |              |              | Fluka           | 52209             |
| Caryophyllene oxide                   | $y = 0.067x + 0.008$                                | 0.999          | 17.66-6.62                 | 2.23    | 1.855        | 5.638        | SAFC            | w509647           |

<sup>a</sup> Response ratio vs. Concentration ratio, internal standard correction applied. Each internal standard is reference compound for the analytes that follow. <sup>b</sup> Quantifier ion. LOD = Limit of detection (signal/noise = 3). LOQ = Limit of quantitation (signal/noise = 10)

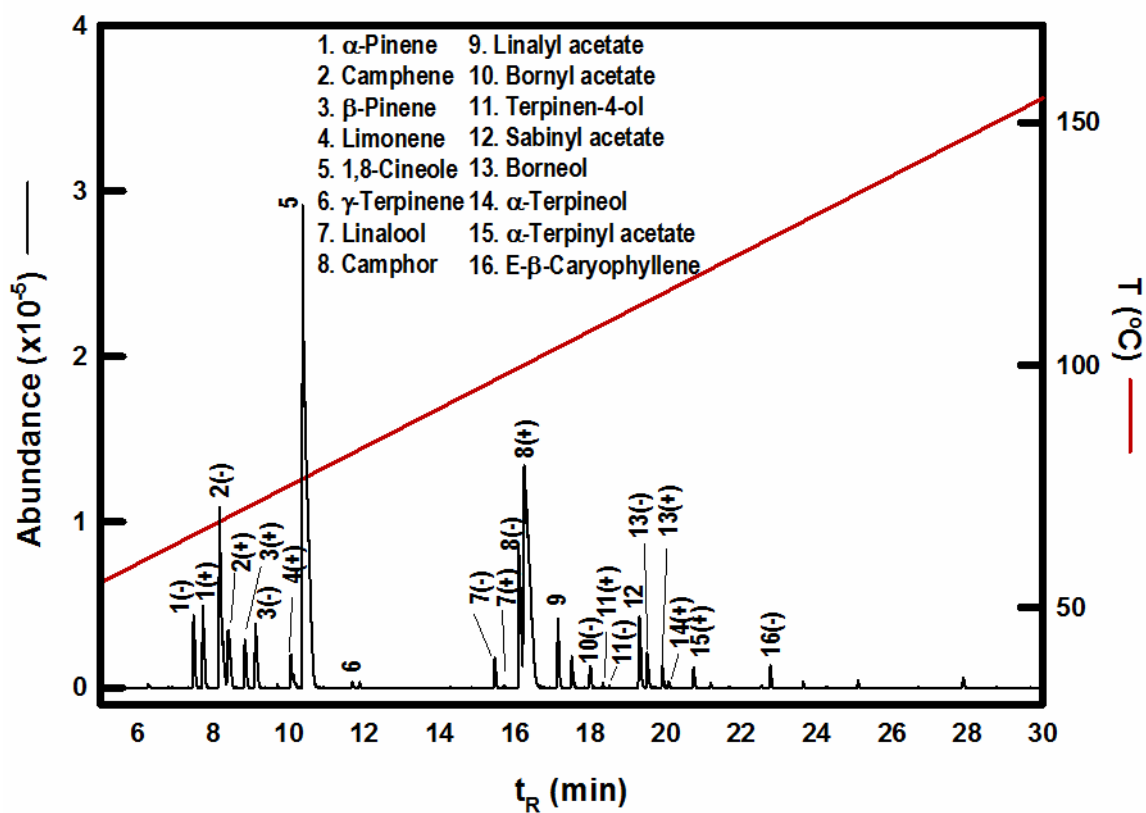

**Figure S4:** Enantioselective Chromatogram of SIEO-2. The dextrorotatory (+) and levorotatory (-) main enantiomers are identified with different numbers.

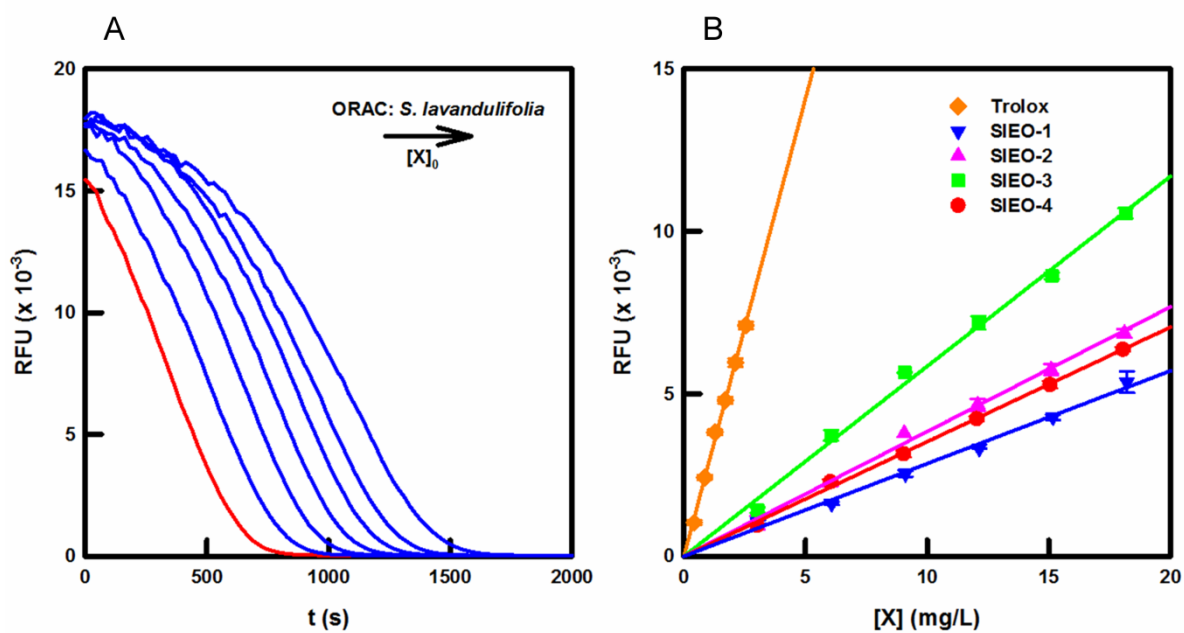

**Figure S5:** Antioxidant capacity of SIEO using ORAC method. (A) Fluorescence curves with different concentrations of SIEO-3. (B) Linear regressions of the area under curve (AUC) with the increase in SIEO concentration.

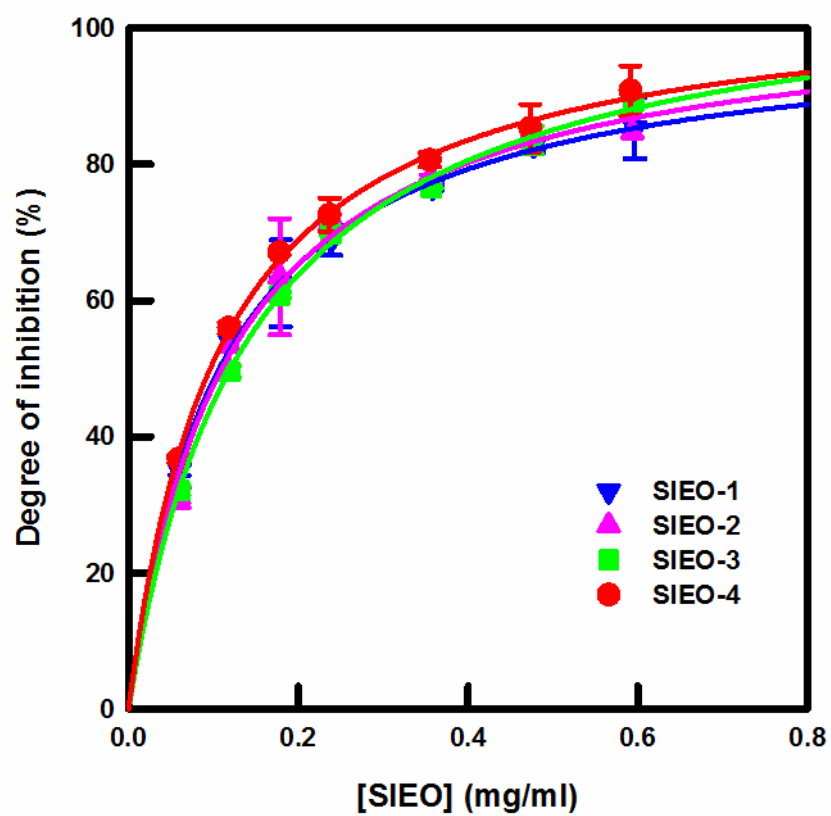

Figure S6: Determination of  $IC_{50}$  of SIEOs. Kinetic analysis of enzyme inhibition data with non-linear regression.
